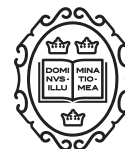

---

## Corrigendum

# Cohort Profile: The Korean Genome and Epidemiology Study (KoGES) Consortium

**Yeonjung Kim, Bok-Ghee Han and the KoGES group**

First published online: 15 April 2016, *Int J Epidemiol*, 2016, doi: <https://doi.org/10.1093/ije/dyv316>

---

In the originally published version of this article, in Table 3, the totals (of men plus women) for individual cancers were incorrect. These should have been: stomach, 1058; colorectal, 1004; liver, 461; lung, 588; breast, 705; thyroid, 1461; and prostate, 352. Also, in the supplementary

data, in Supplementary Table 2, the N value in the KoGES\_CAVAS column should have been 28338 (not 28348).

This has now been corrected.
